# Supplementary material
Source: PubMed Central journal article supplement (PMC2266947)
Supplement: jcem_jc.2007-2507_1.pdf [file jcem_jc.2007-2507_1.pdf]

Ishikawa Supplemental Figure 1

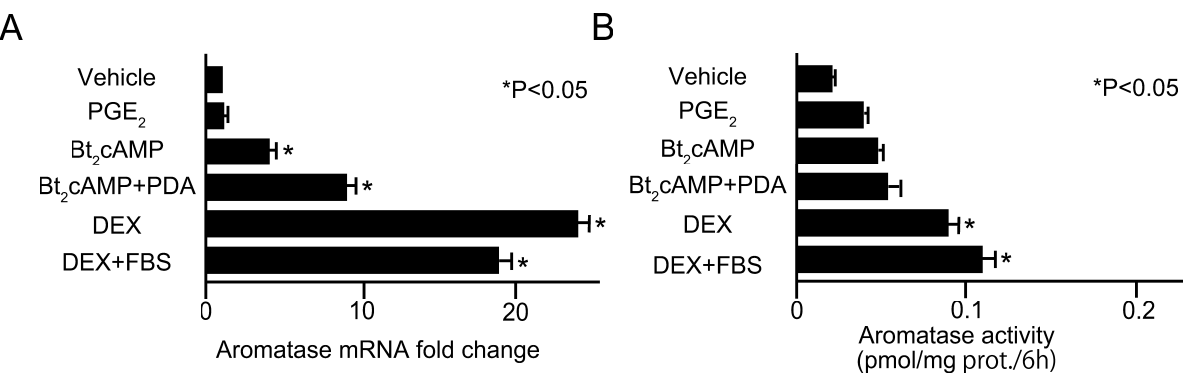

**Supplemental Figure 1. Aromatase mRNA and enzyme activity in MSMCs treated with various aromatase inducers.**

(A) Aromatase mRNA expression levels were measured by real-time RT-PCR and were normalized to GAPDH mRNA. Levels are reported as fold change compared with cells containing vehicle only (vehicle) and represent the average result from myometrial smooth muscle cells (MSMCs) from 5 subjects. (B) Data shown are representative results from aromatase enzyme activity assays of MSMCs from one subject, performed in triplicate. The results from 3 subjects were reproducible, but the range of activity was different for each subject. All values are reported as the mean results of assays performed in triplicate, with the bars indicating the standard error of the mean (SEM). \*P<0.05 (ANOVA).
