# Supplementary material
Source: PubMed Central journal article supplement (PMC2266947)
Supplement: jcem_jc.2007-2507_5.pdf [file jcem_jc.2007-2507_5.pdf]

# Ishikawa Supplemental Figure 5

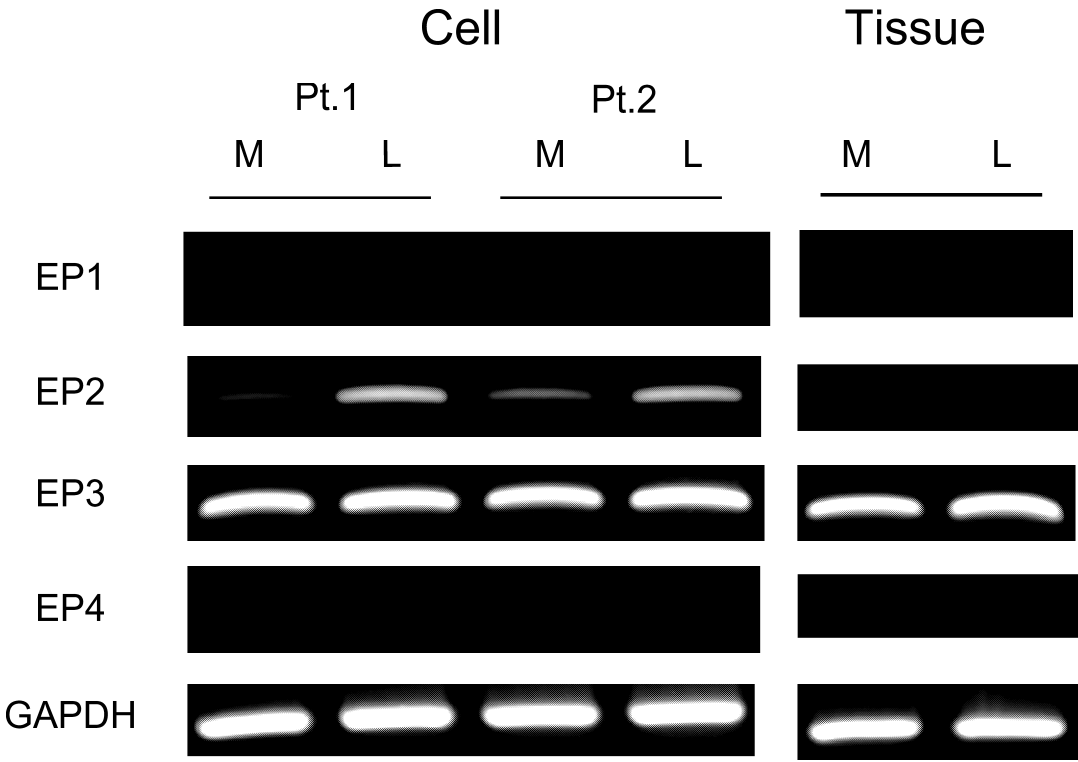

**Supplemental Figure 5. PGE<sub>2</sub> receptor expression in leiomyoma and corresponding myometrium.**

PGE<sub>2</sub> receptor mRNA expression levels were measured by RT-PCR in primary cultured cells and freshly isolated tissues. GAPDH mRNA were measured simultaneously as internal controls. Primary cultured cells were prepared from freshly isolated leiomyoma and corresponding myometrium. Cell, primary cultured leiomyoma smooth muscle cell (L) or myometrial smooth muscle cell (M) ; Tissue, freshly isolated leiomyoma (L) or corresponding myometrium (M); Pt.1 , patient 1; Pt.2, patient 2; EP1-4, prostaglandin E<sub>2</sub> receptor subtype 1-4.
